# Supplementary material for: HBV Integration-mediated Cell Apoptosis in HepG2.2.15
Source: PubMed Central journal article supplement (PMC6692610; doi:10.7150/jca.30493), 2019-07-10
Supplement: jcav10p4142s1.pdf [file jcav10p4142s1.pdf]

Supplementary Files:

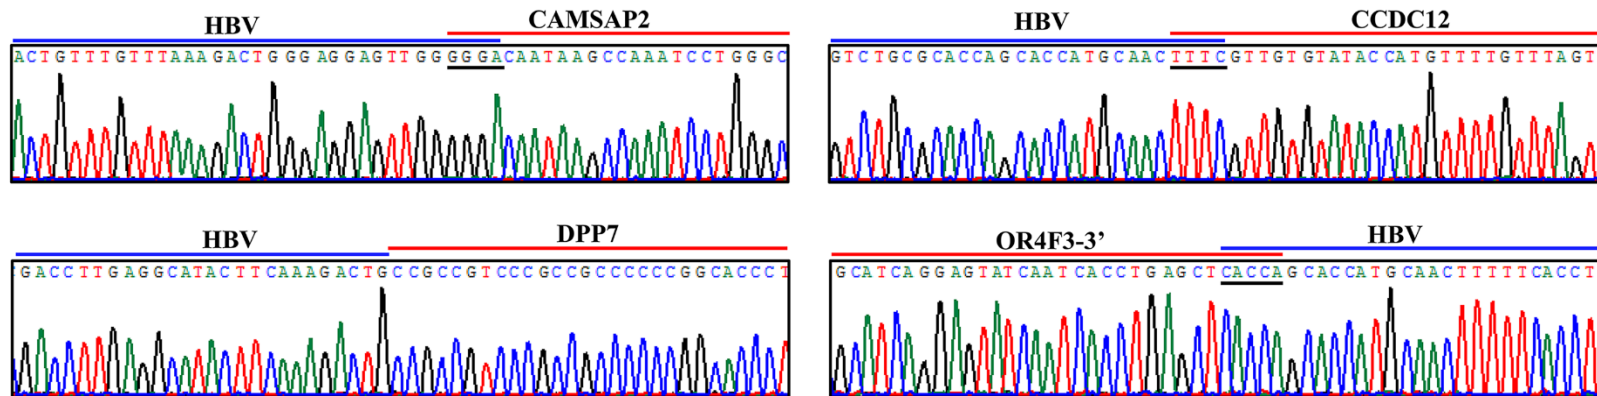

**Figure S1. Sequence verification of HBV-human integration breakpoints by Sanger Sequencing.** HBV-human fusions in both the genome and transcriptome were validated by Sanger sequencing of samples generated from RNA. Alignment of the human and HBV sequences around the integration sites are shown.

**Table S1. Sequences of primers used for Sanger sequencing.**

| <b>Gene</b> | <b>Primer orientation</b> | <b>sequence (5' - 3')</b> |
|-------------|---------------------------|---------------------------|
| CAMSAP2     | Forward                   | CTTCGCTTCACCTCTGCACG      |
|             | Reverse                   | GTTTGAGGAGGCTGAGGAGGA     |
| CCDC12      | Forward                   | CGTGAACGCCACCGAA          |
|             | Reverse                   | CGCACCAGGCCTTGTACTC       |
| DPP7        | Forward                   | CGGGGCGCACCTCTCTT         |
|             | Reverse                   | TGCTCCGCGAAGACCAGTAGA     |
| OR4F3       | Forward                   | TACCACTTCAGCCTAGCCCCTAC   |
|             | Reverse                   | AGCTCCAAATTCTTTATAAGGGTC  |

**Table S2. Sequences of primers used for quantitative RT-PCR analysis.**

| <b>gene</b> | <b>Primer orientation</b> | <b>sequence (5' to 3')</b> |
|-------------|---------------------------|----------------------------|
| DPP7        | Forward                   | GGTGTCGGACAGGTTCTGG        |
|             | Reverse                   | GCGAAGACCAGTAGAGCCC        |
| Rb          | Forward                   | ACTCTCACCTCCCATGTTGC       |
|             | Reverse                   | TGCACTCCTGTTCTGACCTC       |
| cyclinD1    | Forward                   | CCCTCGGTGTCCTACTTCA        |
|             | Reverse                   | CTCCTCGCACTTCTGTTCCCT      |
| cyclinE     | Forward                   | CAGCCTTGGGACAATAATGC       |
|             | Reverse                   | TTGCACGTTGAGTTTGGGTA       |
| CDK2        | Forward                   | CAGGATGTGACCAAGCCAGT       |
|             | Reverse                   | TGAGTCCAAATAGCCCAAGG       |
| p21         | Forward                   | TTAGCAGCGGAACAAGGAGT       |
|             | Reverse                   | CGTTAGTGCCAGGAAAGACA       |
| p27         | Forward                   | ATGTCAAACGTGCGAGTGTCT      |
|             | Reverse                   | CCGAGCTGTTTACGTTTGACG      |
| p53         | Forward                   | TAGTGTGGTGGTGCCCTATG       |
|             | Reverse                   | CCAGTGTGATGATGGTGAGG       |
| GAPDH       | Forward                   | GATTTGGTCGTATTGGGCG        |
|             | Reverse                   | TGGAAGATGGTGATGGGAT        |
